# Supplementary material for: The stabilized supralinear network accounts for the contrast dependence of visual cortical gamma oscillations
Source: PubMed Central journal article supplement (PMC11236182; doi:10.1371/journal.pcbi.1012190), 2024-06-27
Supplement: pcbi.1012190.s001.pdf [file pcbi.1012190.s001.pdf]

| Parameter               | Fig. 1 | Figs. 2-3 | Fig. 4            | Fig. 5                   | Fig. 6 | Unit                             | Description                               |
|-------------------------|--------|-----------|-------------------|--------------------------|--------|----------------------------------|-------------------------------------------|
| $n$                     | 2      |           |                   |                          |        | -                                | power-law I/O exponent                    |
| $k$                     | 0.0194 |           |                   |                          |        | $\text{mV}^{-2} \cdot \text{ms}$ | power-law I/O pre-factor                  |
| $\tau_{\text{corr}}$    | 5      |           |                   |                          |        | ms                               | noise correlation time                    |
| $\tau_{\text{AMPA}}$    | 5      |           |                   |                          |        | ms                               | AMPA decay time                           |
| $\tau_{\text{GABA}}$    | 7      |           |                   |                          |        | ms                               | GABA <sub>A</sub> decay time              |
| $\tau_{\text{NMDA}}$    | 100    |           |                   |                          |        | ms                               | NMDA decay time                           |
| $\rho_{\text{N}}$       | 0.39   | 0 - 0.5   | 0.39              | 0.3 - 0.5                | 0.45   | -                                | NMDA share of excitation                  |
| $J_{EE}$                | 124    | 100 - 300 | 124               | 100 - 300                | 165    | mV                               | total E $\rightarrow$ E connection weight |
| $J_{IE}$                | 116    | 100 - 300 | 116               | 100 - 300                | 123    | mV                               | total E $\rightarrow$ I connection weight |
| $J_{EI}$                | 103    | 50 - 150  | 103               | 50 - 150                 | 114    | mV                               | total I $\rightarrow$ E connection weight |
| $J_{II}$                | 59.3   | 50 - 150  | 59.3              | 50 - 150                 | 57.1   | mV                               | total I $\rightarrow$ I connection weight |
| $g_E$                   | 21.9   | 10 - 30   | 21.9              | 10 - 30                  | 21.7   | mV/s                             | E feedforward current per 1% contrast     |
| $g_I$                   | 10.3   | 5 - 15    | 10.3              | 5 - 15                   | 10.6   | mV/s                             | I feedforward current per 1% contrast     |
| $\lambda_{EE}$          | -      | -         | 0.72              | 0.25 - 0.75 <sup>†</sup> | 0      | -                                | locality of E $\rightarrow$ E connections |
| $\lambda_{IE}$          | -      | -         | 0.70              | 0.25 - 0.75 <sup>†</sup> | 0      | -                                | locality of E $\rightarrow$ I connections |
| $\sigma_{EE}$           | -      | -         | 0.296             | 0.15 - 0.60              | 0.265  | mm                               | range of E $\rightarrow$ E connections    |
| $\sigma_{IE}$           | -      | -         | 0.554             | 0.15 - 0.60              | 0.294  | mm                               | range of E $\rightarrow$ I connections    |
| $\sigma_{EI}$           | -      | -         | 0.09              |                          |        | mm                               | range of I $\rightarrow$ E connections    |
| $\sigma_{II}$           | -      | -         | 0.09              |                          |        | mm                               | range of I $\rightarrow$ I connections    |
| $N_{\text{col}}$        | 1      | 1         | 17 <sup>2</sup>   |                          |        | -                                | number of cortical columns                |
| $L$                     | -      | -         | 6.4               |                          |        | mm                               | retinotopic network width                 |
| $\Delta x$              | -      | -         | 0.4               |                          |        | mm                               | cortical column width                     |
| $M$                     | -      | -         | 2                 |                          |        | mm/degrees                       | cortical magnification factor             |
| $w_{\text{RF}}$         | -      | -         | 0.04 <sup>°</sup> |                          |        | degrees                          | grating input's margin width              |
| $\sigma_{\text{Gabor}}$ | -      | -         | 0.5 <sup>°</sup>  |                          |        | degrees                          | Gabor stimulus sigma                      |

**S1 Table. Parameters of models used in different figures of the main text.** In figures 2, 3, and 5, parameters were sampled independently and uniformly from the ranges given in the table, except for enforcing three inequality constraints (*i.e.*, sampled parameter sets violating any of these inequalities were rejected). See the main text (Methods) for details. †: these were the ranges for sampled  $\lambda_{EE}$  and  $\lambda_{IE}$  of the columnar model; these parameters were zero in the non-columnar model.
