# Supplementary material for: The stabilized supralinear network accounts for the contrast dependence of visual cortical gamma oscillations
Source: PubMed Central journal article supplement (PMC11236182; doi:10.1371/journal.pcbi.1012190), 2024-06-27

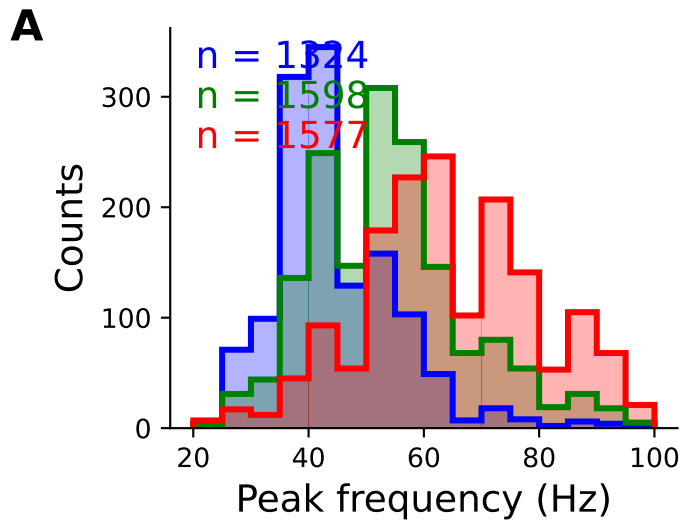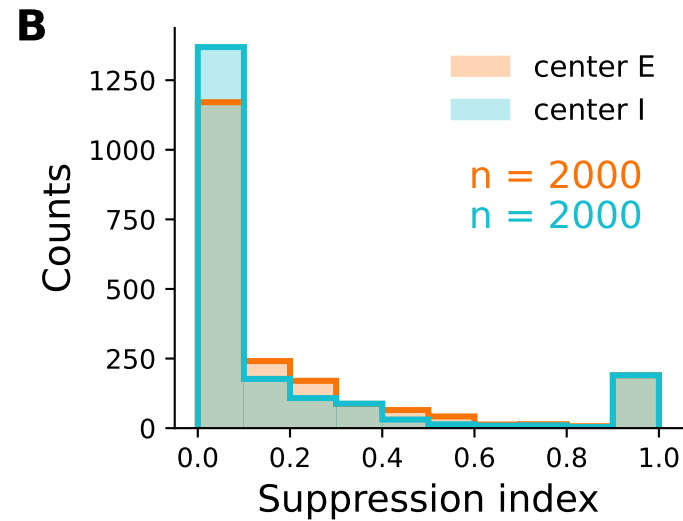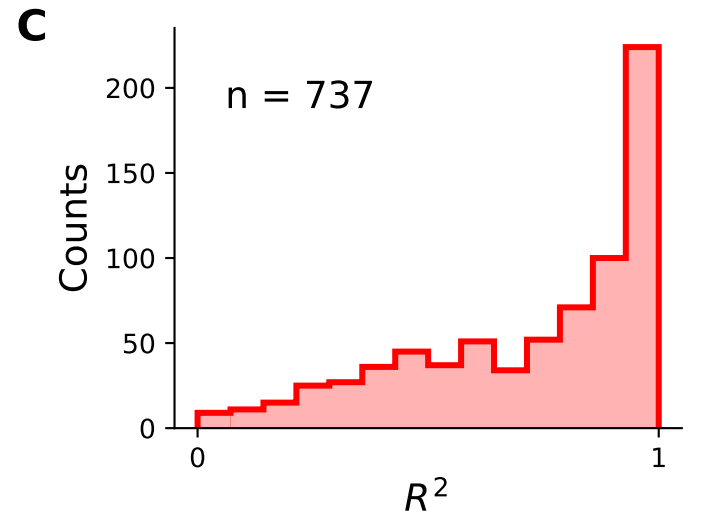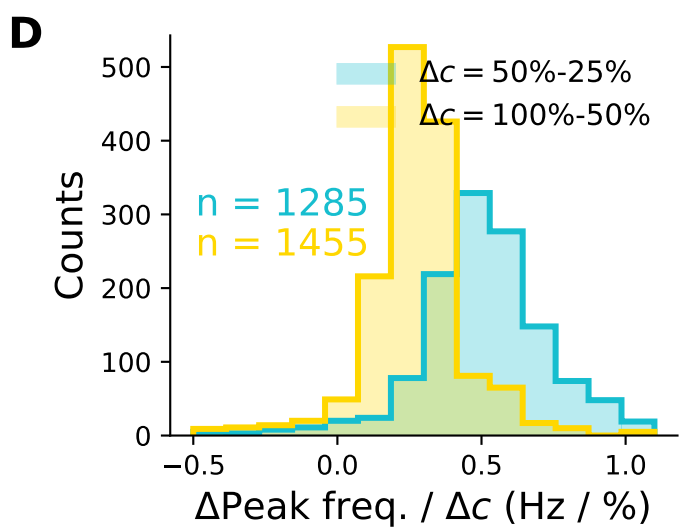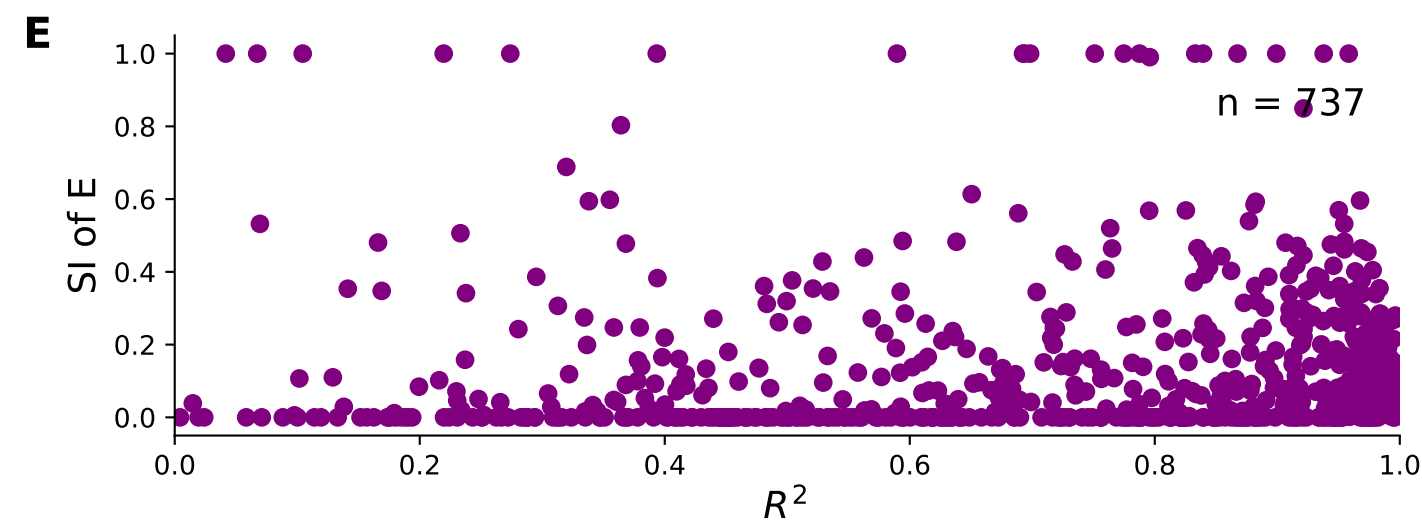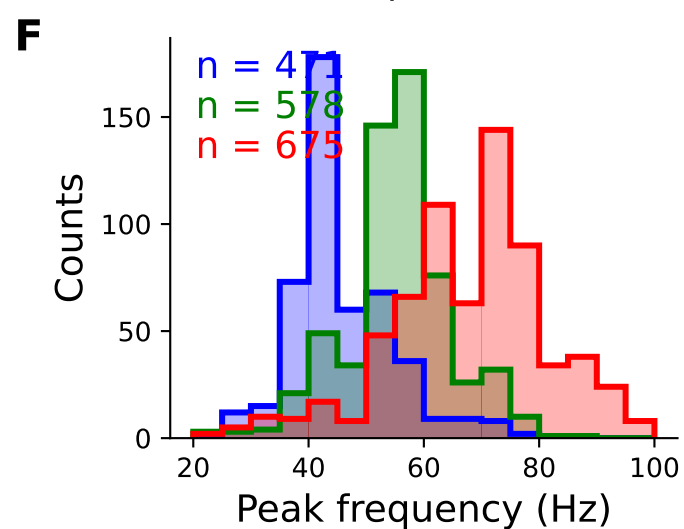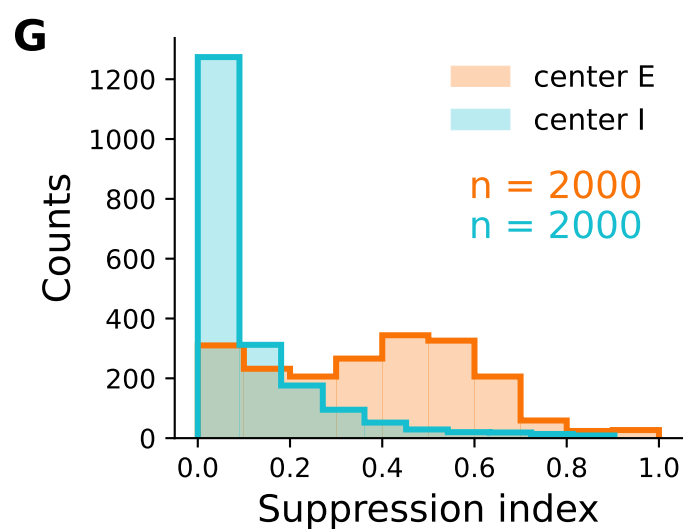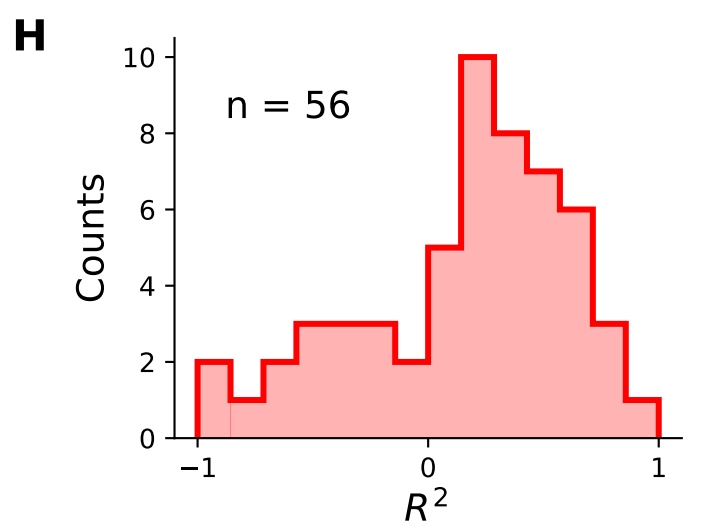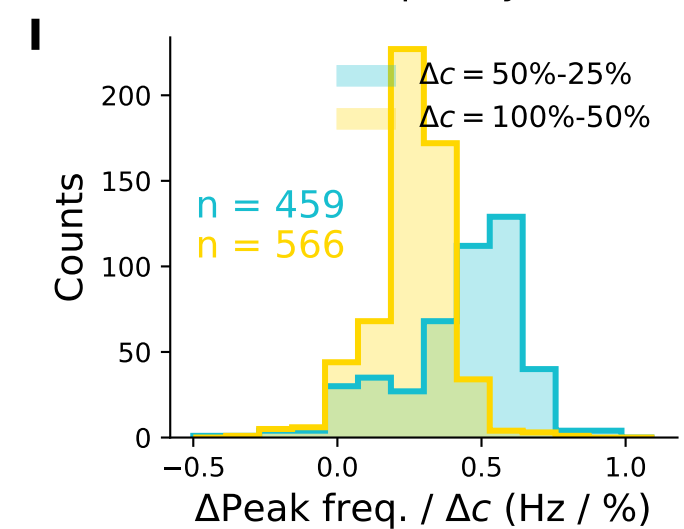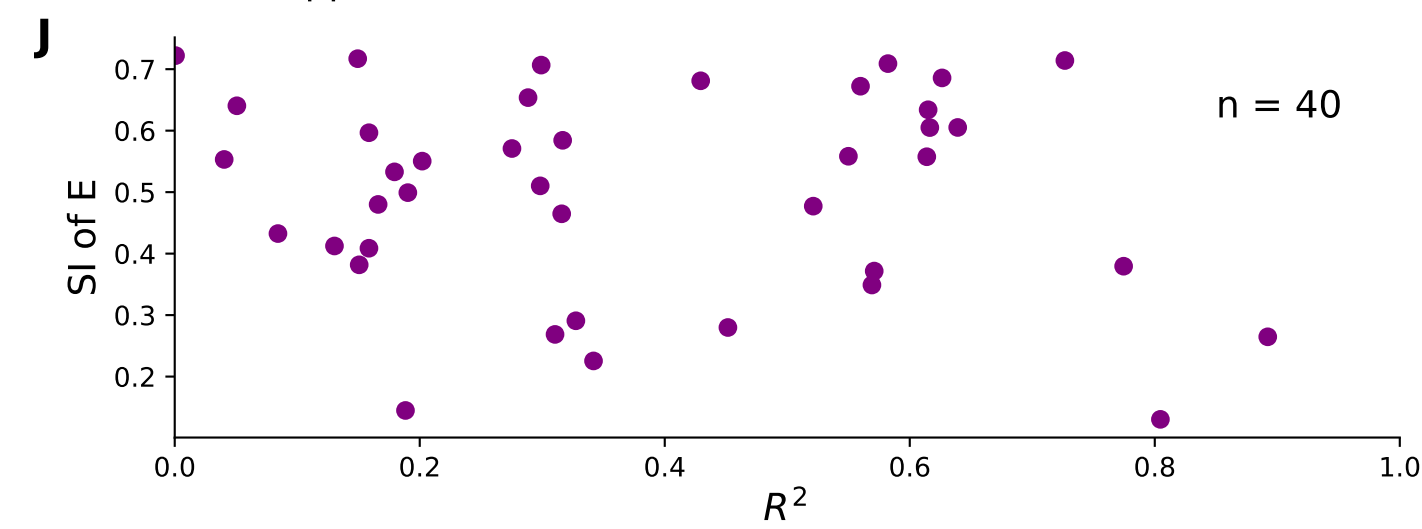

Supplement: pcbi.1012190.s002.pdf [file pcbi.1012190.s002.pdf]
